# Supplementary material for: Molecular characterization of Gleason patterns 3 and 4 prostate cancer using reverse Warburg effect-associated genes
Source: Cancer Metab. 2016 May 5;4:8. doi: 10.1186/s40170-016-0149-5 (PMC4857335; doi:10.1186/s40170-016-0149-5)
Supplement: Additional file 2 — Gene/accession numbers. Table S2. RWE code-set accession numbers. (XLSX 46.8 kb) [file 40170_2016_149_MOESM2_ESM.xlsx]

## Sheet: Sheet1
Gene	Accession Number
ACLY	NM_001096.2
ACTA2	NM_001613.1
ACTB	NM_001101.2
AKT1	NM_005163.2
ALDOA	NM_184041.2
ATG16L	NM_017974.3
ATG5	NM_004849.2
ATM	NM_138292.3
BCL2	NM_000657.2
BECN1	NM_003766.2
BNIP3	NM_004052.2
BNIP3L	NM_004331.2
CA9	NM_001216.2
CAT	NM_001752.2
CAV1	NM_001753.3
CLTC	NM_004859.2
CMYC	NM_002467.3
CNN2	NM_004368.2
COL1A1	NM_000088.3
COL1A2	NM_000089.3
COX2 (PTGS2)	NM_000963.1
CTGF	NM_001901.2
CTSB	NM_001908.3
CXCL12	NM_199168.3
EGFR	NM_201282.1
EGLN1	NM_022051.1
ENO1	NM_001428.2
FAP	NM_004460.2
FBP1	NM_000507.3
FGF2	NM_002006.4
FGF7	NM_002009.3
FOXO1	NM_002015.3
FOXO3	NM_001455.2
GAPDH	NM_002046.3
GLS1	NM_014905.3
GLS2	NM_013267.2
GLUT3	NM_006931.2
GPD2	NM_001083112.2
GPX4	NM_001039847.1
GSN	NM_000177.4
GUSB	NM_000181.1
HGF	NM_000601.4
HIF1A	NM_001530.2
HIF2A	NM_001430.3
HK2	NM_000189.4
HMGCL	NM_000191.2
HMGCS2	NM_005518.3
HPRT1	NM_000194.1
HSF1	NM_005526.2
IGF1R	NM_000875.2
IGF2	NM_000612.4
IL1A	NM_000575.3
IL6	NM_000600.3
IL8	NM_000584.2
IL10	NM_000572.2
IL17A	NM_002190.2
LAMP1	NM_005561.3
LDHA	NM_001165414.1
LDHB	NM_001174097.1
MAP1LC3B	NM_022818.4
MMP2	NM_004530.2
MMP9	NM_004994.2
MONDOA	NM_014938.3
MXI1	NM_001008541.1
NFKBIA	NM_020529.1
NFKB1	NM_003998.2
NOS2 (iNOS)	NM_000625.4
NOS3 (eNOS)	NM_000603.4
NOX2	NM_000397.3
NOX4	NM_001143836.1
NRF1	NM_005011.3
NRF2	NM_006164.3
P4HA1	NM_000917.3
PDGFRB	NM_002609.3
PDK1	NM_002610.3
PFKFB3	NM_001145443.1
PGK1	NM_000291.3
PGM1	NM_001172818.1
PI3KCA	NM_006218.2
PKM1	NM_182471.1
PRDX1	NM_002574.2
PTEN	NM_000314.3
SIRT3	NM_012239.5
SLC16A4 (MCT4)	NM_004696.1
SLC1A3	NM_004172.4
SLC2A6 (GLUT1)	NM_017585.2
SNCG	NM_003087.2
SOD2 (MnSOD)	NM_000636.2
SPARC	NM_003118.2
TFAM	NM_003201.1
TGFB1	NM_000660.3
TGFB2	NM_003238.2
TGFB3	NM_003239.2
TGFBR1	NM_004612.2
TGFBR2	NM_001024847.1
TIGAR	NM_020375.2
TIMP1	NM_003254.2
TKTL1	NM_001145933.1
TNC	NM_002160.3
TOMM20	NM_014765.2
mTOR	NM_004958.3
TP53	NM_000546.2
TPI1	NM_000365.4
TPM2	NM_003289.3
TUBB	NM_178014.2
VEGFA	NM_001025366.1
VIM	NM_003380.2
