# Supplementary material for: Molecular characterization of Gleason patterns 3 and 4 prostate cancer using reverse Warburg effect-associated genes
Source: Cancer Metab. 2016 May 5;4:8. doi: 10.1186/s40170-016-0149-5 (PMC4857335; doi:10.1186/s40170-016-0149-5)
Supplement: Additional file 3 — MTE primer sequences. Table S3. MTE primer sequences. (XLSX 45.9 kb) [file 40170_2016_149_MOESM3_ESM.xlsx]

## Sheet: Sheet1
Gene Symbol	MTE Primer Sequences
	FWD Primer Sequences	REV Primer Sequences
ACLY	CAGCACTTCCCTGCCACT	TCCCAGCACAAAGATGCC
ACTA2	ATCCTGACTGAGCGTGGC	GAACAGGGTCTCTGGGCA
ACTB	ACCACCATGTACCCTGGC	GAAGCATTTGCGGTGGAC
AKT1	ACGCCAAGGAGATCATGC	AGAACTGGGGGAAGTGGG
ALDOA	TAAGCGGAGGTGTTCCCA	GCCGACTCCCCCTTAAAT
ATG16L	AATCAGCCCCCACATCAA	CATTCATGCAACCCACCA
ATG5	TGATTCATGGAATTGAGCCA	TCTGGTCAGGTTGCCTCC
ATM	GCTTCCATGTGTCCCACC	TGAGGGGAATGAAAAACCAG
BCL2	GGGAGGATTGTGGCCTTC	GCCTCAGCCCAGACTCAC
BECN1	CGAGAAGGTCCAGGCTGA	TGTGCCAGATGTGGAAGG
BNIP3	TGGACGCACAGCATGAGT	CCGACTTGACCAATCCCA
BNIP3L	CGGCCTCAACAGTTCCTG	TCTTCTTGTGGCGAAGGG
CA9	TCGCTTGGAAGAAATCGC	GTCCCCACAGGGTGTCAG
CAT	CAAGCAACATGCCACCTG	CCACCCTGATTGTCCTGC
CAV1	ACGAGCTGAGCGAGAAGC	GATGCCAAAGAGGGCAGA
CLTC	GGAGCATCTCCAGCTCCA	GGCGCTGTCTGCTGAAAT
CMYC	AACCGAAAATGCACCAGC	CTCCTCTGCTTGGACGGA
CNN2	GGGCAAGGACAGTGGAGA	CAGGCTTAGCCCCAACAA
COL1A1	CACTGGGTTCGGAGGAGA	TAAAATGGGGAGCCGCTT
COL1A2	GTGGTGAGGTCGGTCCTG	GCCTCCATCACCACGACT
COX2 (PTGS2)	TCCACCAACTTACAATGCTGA	CTGGGGATCAGGGATGAA
CTGF	TGGAGTATGTACCGACGGC	CTGGCTTCATGCCATGTCT
CTSB	GACCGGATCTGCATCCAC	GTGGTGCTCACAGGGAGG
CXCL12	GCCGCACTTTCACTCTCC	GCTTTCGAAGAATCGGCA
EGFR	AGTTTGCCAAGGCACGAG	TCCACTGTGTTGAGGGCA
EGLN1	GAAACCATTGGGCTGCTC	ACCTTGGCATCCCAGTCT
ENO1	GCCCTGTTGGCAGCTCTA	TCATGGGTCACTGAGGCTT
FAP	GCAAGTGGGAGGCCATAA	TGGGCCGTAGCAGACAAG
FBP1	GCTGGACGTCCTCTCCAA	TGGTTCCAACGGACACAA
FGF2	CAAGCGGCTGTACTGCAA	TCCGTAACACATTTAGAAGCCA
FGF7	GATTCTGCTGGAGAACTTTTCA	TGATAACAACACAGGATTCCTCC
FOXO1	GCAATCCCGAAAACATGG	TAGGCATCTGGGGCAAAG
FOXO3	CAGTCGGACCCCTTGATG	GAATTCGACAAGGCACGG
GAPDH	GAAGGTGGTGAAGCAGGC	CTCCTTGGAGGCCATGTG
GLS1	TTGTTTTGTTGACACAAGCATTT	GAAGGGAACTTTGGTATCTCCA
GLS2	TTCCTGATCGAGGCTTGC	TCTTTGGACAGGGCCTCA
GLUT3	GTGGGGTGGGGTGGG	TCAGCCAACAAAACCTTCAA
GPD2	CTTCTTGACCCAGCGACC	GCCAGGACATCCCCTCTT
GPX4	CCGTGTAACCAGTTCGGG	TTGATGGCATTTCCCAGG
GSN	CGTGGCTGATGAGAACCC	CCCTCAGGAAGGACCGAG
GUSB	CCACATGCAGGTGATGGA	ATACGGAGCCCCCTTGTC
HGF	ATGCCTCTGGTTCCCCTT	CCGATAGCTCGAAGGCAA
HIF1A	CACAGAAGCAAAGAACCCA	GGCAGTGGTAGTGGTGGC
HIF2A	GCTGCCAAGAGGGTCTGA	ACGTGGACGGGGTCACTA
HK2	TGTTGTTGGTTTCCAAAAAGG	TTCACTAGACTGAGTGCTCAAGG
HMGCL	GGGCTGTCAGCACCTCAT	CCATCTGGGGAACCCACT
HMGCS2	GGGGGCTAAAGCTGGAAG	AGTGGTGGGACAGAAGCG
HPRT1	GGACTGAACGTCTTGCTCG	TCCCCTGTTGACTGGTCATT
HSF1	GAGATGGATCTGCCCGTG	TGGCCATGTTGTTGTGCT
IGF1R	GCCCTGGTCATCTTCGAG	CTGGACACAGGTCCCCAC
IGF2	CGGCTTCCAGACACCAAT	CGGGCCTGCTGAAGTAGA
IL1A	TCCTCCATTGATCATCTGTCTC	TCAGAACCTTCCCGTTGG
IL6	CATGTGTGAAAGCAGCAAAGA	CTGCACAGCTCTGGCTTG
IL8	TCCATAAGGCACAAACTTTCA	CCTTGGCAAAACTGCACC
IL10	ACAGCTGCACCCACTTCC	TTCTCAGCTTGGGGCATC
IL17A	AGAACTTCCCCCGGACTG	GTCCACGTTCCCATCAGC
LAMP1	TGCCGCTCTAAATTGGCT	GAAGCGCTCCAGACACTCA
LDHA	CCTTGAGCCAGGTGGATG	GTTGGTTGCATTGTTTGTATGT
LDHB	CCAGGATTCATCCCGTGT	CTGGATGTCCCACAGGGT
MAP1LC3B	TCTCCCACACCAAGTGCAT	TTGTGACCTGCTACACATAGGG
MMP2	TCCTCTCCACTGCCTTCG	TGAGGGTTGGTGGGATTG
MMP9	CCACTGTCCACCCCTCAG	CCCCTGCCCTCAGAGAAT
MONDOA	AATCCCCGGGAAATAGCA	TGTGCAGGTGGGTTGTTG
MXI1	CAGCAGCCTGCCGAGTAT	CAGGTCCTCTGACCCTTTTG
NFKBIA	CCAAGCACCCGGATACAG	TTCAGCCCCTTTGCACTC
NFKB1	GTTTGGTAGTGGCGGTGG	TCACAACCTTCAGGGTCCTT
NOS2	CAGCGGGATGACTTTCCA	CACCCTGGCCAGATGTTC
NOS3	ACTGAGATCGGCACGAGG	GCTTCATGAAAGAGGCCG
NOX2	TCCCTAGGGTCAAGAACAGG	GACCACTTTGGGCAGGAA
NOX4	CCAAGCAGGAGAACCAGG	CCTGTCAGGCCAGGAACA
NRF1	AGAAACGGAAACGGCCTC	CGCACCACATTCTCCAAA
NRF2	GCTTTTGGCGCAGACATT	GCTCCTCCCAAACTTGCTC
P4HA1	AGTTGGGCAAAGTGGCCT	AAGCTTCTTTGTGAGCAAAAGTG
PDGFRB	ACTGGAGACCGATGAGCG	CAGTGCAACGTCCCCTTT
PDK1	CAGTGCCTCTGGCTGGTT	CAGCCTCGTGGTTGGTGT
PFKFB3	AATTGCGGTTTTCGATGC	GTCGTCCATGGCTTCTGC
PGK1	AGACTGGCCAAGCCACTG	GGTGATGCAGCCCCTAGA
PGM1	TGCCAAACAAGATGCCCT	TGGCCTCACTCACTGCTG
PI3KCA	AGCAAATGAGGCGACCAG	TTGCCGTAAATCATCCCC
PKM1	GAATGCTGGACTGGAGGC	AGCAAGTAAGGGCCAGGG
PRDX1	CTGCCAAGTGATTGGTGCT	TGATCTGCCGAAGAATACCC
PTEN	GTGGCGGAACTTGCAATC	GCATCTTGTTCTGTTTGTGGAA
SIRT3	GAGCTGCCTGCCTGTTTG	ATGAAGAGGGCTGGGGAC
SLC16A4 (MCT4)	TACCTCATCCTCTGCGGC	ACAGCCATCCCAGCAAAG
SLC1A3	GGGGCAGGATGGAGAGAT	TCGGAGGGTAAATCCAAGG
SLC2A6 (GLUT1)	ACGGGGAGGACTGAGAGG	TGCTGGGATTACAGGCGT
SNCG	CCCAGAGTGGGGGAGACT	GAGGGAGGGCAGTGAGGT
SOD2 (MnSOD)	GGGTTGGCTTGGTTTCAA	TGCAAGCCATGTATCTTTCAG
SPARC	CTCTCCCACACCGAGCTG	GAAACACGAAGGGGAGGG
TFAM	GATAACACACGCCGGAGG	AGTCGACTTCCACAGCCG
TGFB1	GGTGGAAACCCACAACGA	GCTGAGGTATCGCCAGGA
TGFB2	TCGATTTGACGTCTCAGCA	AGGAGAGCCATTCGCCTT
TGFB3	CGCAGAAGAAAGGGTGGA	ACAGGGTCTTGGAGGGGA
TGFBR1	GCCAGGAGAAATGGGGAT	TGGGTCCCACAACTTCCA
TGFBR2	GCAGGTGGGAACTGCAAG	TTTCGACACAGGGGTGCT
TIGAR	CATTTCCATTTTTGGATGAGG	TGGCCAAATATTGCACTTCC
TIMP1	TCGTCATCAGGGCCAAGT	GGTTGTGGGACCTGTGGA
TKTL1	GCTCCGGCAGTTCTTCTG	TGCCATTCCACATGCAAC
TNC	CTGACTGCAGCCGTGAAA	AAGCAGTCATTGGGGCAG
TOMM20	TGTGGTGCAGTGGAAGGA	TCTGTACTGGTCATCCCCC
mTOR	CTCTCCTGGCCTCACGAC	TGAGGTGGATGGAGGGTG
TP53	GCTGAATGAGGCCTTGGA	GAGGCTGTCAGTGGGGAA
TPI1	CGTCACCAAGGTGGCTTC	CCCTCACATGGGTGGTTC
TPM2	GCCCAGGCGGACAAGTAT	TCCTCGCTAATGGCCTTG
TUBB	TGTTCCTCGTGCCATCCT	TGCAGGCAGTCACAGCTC
VEGFA	GAGGGCCTGGAGTGTGTG	TTTGCCCCTTTCCCTTTC
VIM	CTCCGGGAGAAATTGCAG	GCCTGCAGCTCCTGGAT
