# Supplementary material for: Molecular characterization of Gleason patterns 3 and 4 prostate cancer using reverse Warburg effect-associated genes
Source: Cancer Metab. 2016 May 5;4:8. doi: 10.1186/s40170-016-0149-5 (PMC4857335; doi:10.1186/s40170-016-0149-5)
Supplement: Additional file 4 — NanoString probe sequences. Table S4. NanoSNanoStringtring probe sequences. (XLSX 42.1 kb) [file 40170_2016_149_MOESM4_ESM.xlsx]

## Sheet: Sheet1
Gene Symbol		Nanostring Probe Sequences
		CP: Capture Probe Sequences RP: Reporter Probe Sequences
ACLY	CP:	GACCATCTACATTCAGGATAAGATTTGGCTTCTTCGAGGTGGTAATCTTC
	RP:	AGTAAAGGACCCACAGTTTCTAAGCATGTCTACAAATGCGACTCCGATGA
ACTA2	CP:	CTCCTTGATGTCCCGGACAATCTCACGCTCAGCAGTAGTAACGAAGGAAT
	RP:	GCGGCAGTGGCCATCTCATTTTCAAAGTCCAGAGCTACATAACACAGTTT
ACTB	CP:	GATCTTGATCTTCATTGTGCTGGGTGCCAGGGCAGTGATCTCCTTCTGCA
	RP:	AGGATGGAGCCGCCGATCCACACGGAGTACTTGCGCTCAGGAGGAGCAAT
AKT1	CP:	GGGCTGAGCTTCTTCTCGTACACGTGCTGCCACACGATACCGGCAAAGAA
	RP:	CATCAAAATACCTGGTGTCAGTCTCCGACGTGACCTGGGGCTTGAAGGGT
ALDOA	CP:	CACCACACACCACTGTCACGAGGGAAGAAAGAGCGCGGGCAAGCCAG
	RP:	TTATTTGGCAGTGTGCCGGAAAGGGTGATGGACTTAGCATTCACAGACGA
ATG16L	CP:	AACCCAAGGTGTTGGGACATGCGTTAGGCCAGAACCGACTTTGGAAGGAC
	RP:	TCGGGAGTTTCCGTTAATCCAATGCTTAAAGTGAGTTCACCGGGCAAATG
ATG5	CP:	AATATGAAGAAAATTATCCGGGTAGCTCAGATGTTCACTCAGCCACTGCA
	RP:	TGTTCAGGCAAATAGTTGATCCTTCAATCTGTTGGCTGTGGGATGATACT
ATM	CP:	AAGGCAGGCAGTGGGAATTAAATGTACCTCCTTCCACCCCTGCCATAAAG
	RP:	GCTTTTAGCTTAGACATCTATATGGGGAGCAAAGAACCCAGGGCTTGCCA
BCL2	CP:	GGGCGACATCTCCCGGTTGACGCTCTCCACACACATG
	RP:	TACTCAGTCATCCACAGGGCGATGTTGTCCACCAG
BECN1	CP:	GCTCCAGCTGCTGTCGTTTAAATTCACTGTATTCTCTCTGATACTGAGCT
	RP:	CGTCTGGGCATAACGCATCTGGTTTTCAACACTCTTCAGCTCATCATCCA
BNIP3	CP:	ATCTGTTTCAGAAGCCCTGTTGGTATCTTGTGGTGTCTGCGAGCG
	RP:	ATATCATCTTCCTCAGACTGTGAGCTGTTTTTCTCTCCAATGCTATGGGT
BNIP3L	CP:	GGATGGTACGTGTTCCAGCCCCCCATTTTTCCCATTGCCATTATCATTGC
	RP:	TGTGCATCCAAAAGAATCTTCTCCATGTCTCCATTGTGGATGGAGGATGA
CA9	CP:	CGGCTGAAGTCAGAGGGCAGGAGTGCAGATATGTC
	RP:	CACAGGGCGGTGTAGTCAGAGACCCCTCATATTGGAAGTAG
CAT	CP:	AGGCGATGGCGGTGAGTGTCAGGATAGGCAAAAAGGCGGC
	RP:	CTCGAGCACGGTAGGGACAGTTCACAGGTATATGAAGATAATTGGGTCCC
CAV1	CP:	TCAAAGTCAATCTTGACCACGTCATCGTTGAGGTGTTTAGGGTCGCGGTT
	RP:	TCCAAATGCCGTCAAAACTGTGTGTCCCTTCTGGTTCTGCAATCACATCT
CLTC	CP:	CAGACTCCATAGTCAGGGTACTGAAGCCAATGTTTGCTGGGTTGATACCC
	RP:	TACCACCTGGGCCTGCTCTCCTACTTTTTCTCTAATGCAGATGAATTTGT
CMYC	CP:	CGCTCCAAGACGTTGTGTGTTCGCCTCTTGACATTCTCCTCGGTG
	RP:	TCTGGTCACGCAGGGCAAAAAAGCTCCGTTTTAGCTCGTTCCTCCTCTGG
CNN2	CP:	ACTTGGGAGCCGGAGATATTTAACATCACGGCCCGGTCCC
	RP:	GGTCTGAAGTCTGTTGATCTGAAGGTCCTAGGCAAATCCAGTC
COL1A1	CP:	GCCCTGCGGCACAAGGGATTGACACGCGTTCCCCAAATCCGATGTTTCTG
	RP:	GTCTTTCAGCAACACAGTTACACAAGGAACAGAACAGTCTCTCCCGCCCA
COL1A2	CP:	TTTAGCACCAGGTTGACCAGCAGCACCAGCAGGACCAGCAAATCCATTGG
	RP:	GGACCAACAACACCGTTTTCACCCTTAGGCCCTTTGGCTCCTCTTTCTCC
COX2 (PTGS2)	CP:	GGCTCTAGTATAATAGGAGAGGTTAGAGAAGGCTTCCCAGCTTTTGTAGC
	RP:	TTACCTTTGACACCCAAGGGAGTCGGGCAATCATCAGGCACAGGAGGAAG
CTGF	CP:	TTCTTCATGACCTCGCCGTCAGGGCACTTGAACTCCACCGG
	RP:	CTCCGGGACAGTTGTAATGGCAGGCACAGGTCTTGATGAACATCATGTTC
CTSB	CP:	GAAGTTCCAAGCTTCAGCAGGATAGCCACCATTACAGCCGTCC
	RP:	CCTACATGGGATTCATAGAGGCCACCAGAAACCAGGCCTTTTCTTGTCCA
CXCL12	CP:	CAGCACGACCACGACCTTGGCGTTCATGGCGCGGGCGGGCG
	RP:	CCCGTCGCTGAGGCAGAGCGCGGTCAGCACGAGGAC
EGFR	CP:	AACATCCTCTGGAGGCTGAGAAAATGATCTTCAAAAGTGCCCAACTGCGT
	RP:	TCTGCACATAGGTAATTTCCAAATTCCCAAGGACCACCTCACAGTTATTG
EGLN1	CP:	GCTTCCCGTTACAGTGGCGTATCAGGTCGTCCATG
	RP:	ACCATGGCTTTCGTCCGGCCATTGATTTTGTAGCTGCCCA
ENO1	CP:	GACACGAGGCTCACATGACTCTAGACACTTGGTGGAAAGTGAGGCGAGAA
	RP:	ATTTTGAGCACAAAACCACCGGGGATCTAGCCTGTGGCCACCCCGGAGAT
FAP	CP:	CCTTAGATGGCAAGTAACACACTTCTTGCTTGGAGGATAGCTTCCAATGC
	RP:	TACTTGGCGTAGTCGCTGAAACTTGCTGTGTAATATTGGCACCTTTCTTT
FBP1	CP:	GGCGTGTTTATCTTCTTCTGACACGAGAACACACGTGGCAAAGGATGACT
	RP:	GGATCAAAACAGACCACATATTTACCCCTTTTCTCCGGTTCCACTATGAT
FGF2	CP:	TCTTCTGCTTGAAGTTGTAGCTTGATGTGAGGGTCGCTCTTCTCCCG
	RP:	TAGCCAGGTAACGGTTAGCACACACTCCTTTGATAGACACAACTCCTCTC
FGF7	CP:	TATATAAGAATTCCATGTCTGTTGTCTGCCTGGTGCAACTTGAGCCTTTC
	RP:	GCTGTGACGCTGTTTGCTATTTGACTTTTGTTTTGTTGCTAACAGCTGGA
FOXO1	CP:	GGTGCCAGGTGAGGACTGGGTCGAAACAGTTAATGATGTTGGTGATGAGA
	RP:	AAACTGGTGTTTGGTGGCGCAAACGAGTAGCACGGCGTCTGCTGCATCAT
FOXO3	CP:	GCTGGGCAGCAAAGGACATCATCGGATCATTGCGAAGCATCACGTTCCGG
	RP:	TTGGTGCTGGTGGTGGAGCAAGTTCTGATTGACCAAACTTCCCTGGTTAG
GAPDH	CP:	AAGTGGTCGTTGAGGGCAATGCCAGCCCCAGCGTCAAAG
	RP:	CCCTGTTGCTGTAGCCAAATTCGTTGTCATACCAGGAAATGAGCTTGACA
GLS1	CP:	ACTGAATTTGGCCAGTTGAGGAATATAATCTGCAACCTTTCCTCCAGACT
	RP:	GAATGCCTCTGTCCATCTACTGTACAAACAGACACACCCCACAAATCGGG
GLS2	CP:	AAGCAGTTTGACCACCTCCAGATGGTTGAACTGCACAGCATCATC
	RP:	CCTGAGTTTCAGAGAGTGTGTAGGAGTCCTGGTAATCTTG
GLUT3	CP:	TTATAATCTCCGCAAAGGGTGGAGCCTGAAAGGGCGACAAGCCCCCAG
	RP:	CAAAGTCTTACCATTACAGCATCTCTGGGTCTCGCTGGGATCATGACTAT
GPD2	CP:	GCGATCGTCATCTTTTGCCAGGGTAAGAAGAAAATAACTCGCCCATCACT
	RP:	CTGAAGGAATTGGATGGTGTGTAACATCAGTTGGAGTATCAGTAGTGCCA
GPX4	CP:	TTTGACGTTGTAGCCCGCGGCGAACTCTTTGATCTCTTCGTTACTCC
	RP:	GTGGGCGTCGTCCCCGTTCACGCAGATCTTGCTGAACATATCGAA
GSN	CP:	CTCTCCTCCGTGTTTGCCTGCTTGCCTTTCCAGACAAAGATTTTCCCATC
	RP:	TAGTCCATCTTGGTGATGAAGTCAGAGGCTGTTTTGAGGGCAGCCTTC
GUSB	CP:	AGATTCTAGGTGGGACGCAGGCTCGTTGGCCACAGA
	RP:	TCCAAGGATTTGGTGTGAGCGATCACCATCTTCAAGTAGTAGCCAGC
HGF	CP:	ACTCTTAGTGATAGATACTGTTCCCTTGTAGCTGCGTCCTTTACCAATGA
	RP:	AAGCTGTGTTCGTGTGGTATCATGGAACTCCAGGGCTGACATTTGATGCC
HIF1A	CP:	TCTAATGGTGACAACTGATCGAAGGAACGTAACTGGAAGTCATCATCCAT
	RP:	CTGTAACTGTGCTTTGAGGACTTGCGCTTTCAGGGCTTGCGGAACTGCTT
HIF2A	CP:	TGTCCAAATGTGCCGTGTGAAAGACCATCCGAGTCACATAGCTCAGTGCA
	RP:	CCTCATTTGCATGAATTCCCGTCTAAACCATCTCATGGTAGTTCTGGAAA
HK2	CP:	TTTACACAAAGCAAAGCCATGTCAGCAAGGGACTGTCAACCTGATTCTGA
	RP:	TTTGAGATGATTCGCTATTCATCACACCCCGAAGATTGAGATCCACTGTA
HMGCL	CP:	TATTCTTTTCATTTTGTAGTCCATCTCGGGGACCAACTTCCACAATTTTC
	RP:	TGCTTCAGAAAGCATGTCTATCAGCTTGATTTTCACTGGAGTAGATACGA
HMGCS2	CP:	ACATGTCCTGAGAGGCCTTTAGAAGTGCTTTATCCAGGTC
	RP:	CCATTGTGAGTGGAGAGGTAAAGGGAAGCCTTGGTTTTCTTGTCGA
HPRT1	CP:	TGAGCACACAGAGGGCTACAATGTGATGGCCTCCCATCTCCTTCATCACA
	RP:	CAGTGCTTTGATGTAATCCAGCAGGTCAGCAAAGAATTTATAGCCCCCCT
HSF1	CP:	GTCCACAGCTTGGTCAGGAAGGCCGGGACGTTGCT
	RP:	AGATGAGCGCGTCGGTGTCCGGGTCGCTCACGAGG
IGF1R	CP:	TGGAGAGGTAACAGAGGTCAGCATTTTTCTCAATCCTGATGGCCCCCCGA
	RP:	CACAATGTAGTTATTGGACACCGCATCCAGGATCAGGGACCAGTCCACAG
IGF2	CP:	GCACGAGGCGAAGGCCAAGAAGGTGAGAAGCACCAGCATCGACTTCCC
	RP:	CACAGGGTCTCACTGGGGCGGTAAGCAGCAATGCA
IL1A	CP:	TTTCAGAGATACTCAGAGACACAGATTGATCCATGCAGCCTTCATGGAGT
	RP:	TGCTACTACCACCATGCTCTCCTTGAAGGTAAGCTTGGATGTTTTAGAGG
IL6	CP:	CATCTTTTTCAGCCATCTTTGGAAGGTTCAGGTTGTTTTCTGCCA
	RP:	GATGATTTTCACCAGGCAAGTCTCCTCATTGAATCCAGATTGGAAGCATC
IL8	CP:	CCGGTGGTTTCTTCCTGGCTCTTGTCCTAGAAGCTTGTGTG
	RP:	AGCCACGGCCAGCTTGGAAGTCATGTTTACACACAGTGAGATGGTTCCTT
IL10	CP:	AAGTCCTCCAGCAAGGACTCCTTTAACAACAAGTTGTCCAGCTGATCCTT
	RP:	GGTAAAACTGGATCATCTCAGACAAGGCTTGGCAACCCAGGTAACCCTTA
IL17A	CP:	GGGTCCTCATTGCGGTGGAGATTCCAAGGTGAGGTG
	RP:	GCACTTTGCCTCCCAGATCACAGAGGGATATCTCTCA
LAMP1	CP:	ATGCGTCCTACGTGTGACGGCCAGAGGCTTTCCCTTTGTAAGGCTTAAAT
	RP:	TGTTGTAATGTGTGAGCATGTCAGCCTCACCACGAGTGACCTTC
LDHA	CP:	CTGGGAAAAAATGTTGGACTAGGCATGTTCAGTGAAGGAGCCAGGAAGTT
	RP:	GCACAAGACATGATATTGGATTTATACACTGGATCCCAGGATGTGACTCA
LDHB	CP:	TGGTTAATCCCCGGGCATTGAGGATACATGGAAGGCTCAGGAAGACTTCA
	RP:	TTTCTTGAGCTGAGCAACCTCATCATCCTTTAGCTTCTGGTTGATAACGC
MAP1LC3B	CP:	TGAGGAGGTTTAACTCTTGACATTAGTATCTGTAAAGAGCGTACGGCTCT
	RP:	AACCCCATGCAAGTACTGGGAAGCACTAGTCTTTTATCACAGGTTGAACC
MMP2	CP:	AATGCTGATTAGCTGTAGAGCTGAAGGCACGGCTGCCAGG
	RP:	CACCGGGAGGAGCCACTCTCTGGAATCTTAAATTACCAGGTAGGAGTGAG
MMP9	CP:	AGATGTTCACGTTGCAGGCATCGTCCACCGGACTCAAAGGCACAG
	RP:	CCCATCCTTGAACAAATACAGCTGGTTCCCAATCTCCGCGATGGCGTCGA
MLXIP	CP:	AAAGGCTCAAAGGTGTCCATGAAGTCCAGGTTAGGCTGCAAAGGAATCAG
	RP:	CAGGTAGCATGGAGCCAAAAATGGAGCGGCTAGAAGAGAAGAGGTCCTGG
MXI1	CP:	GAAGTGAATGAAAGTTTGACACTGGCACTGGAGTAACCCTCGTCACTCCC
	RP:	TGGCCCAGTGAATATTTTGCCCTGCACTGTTATGTCATGCTGGGTTCTAT
NFKBIA	CP:	CCTCTGTGAACTCCGTGAACTCTGACTCTGTGTCATAGC
	RP:	GCCTCCAAACACACAGTCATCATAGGGCAGCTCGT
NFKB1	CP:	AAGTAATCCCACCATAAGTAGGAAATCCATAGTGTGGGAAGCTATACCCT
	RP:	CATGGTTCCATGCTTCATCCCAGCATTAGATTTAGTAGTTCCAGGATGGA
NOS2	CP:	CCCTGGGTCCTCTGGTCAAACTTTTGGGAGTCATAATGGACCC
	RP:	GACAAATTCGATAGCTTGAGGTAGAAGCTCATCTGGAGGGGTAGGCTTGT
NOS3	CP:	CGTTGATTTCCACTGCTGCCTTGTCTTTCCACAGGGACGAGG
	RP:	CGATGGTGACTTTGGCTAGCTGGTAACTGTGCAGCACGGCCA
NOX2	CP:	TGGCAGGAGGTTAATTCTCCACCTCCAACCCTCTTTTTTCATGCTTCAAA
	RP:	TCTGCATTTATTTTATAGCACAAGGAGCAGGACTAGATGAGCCAGAGTCA
NOX4	CP:	AGATGGGCAGCCACATGCACGCCTGAGAAAATACAGATAGTAACACCACA
	RP:	GTTCAACAAAGTCTTCACTGTAATTCACTGAGAAGTTGAGGGCATTCACC
NRF1	CP:	GTTTCCGAAGCAAACGTGTTTGTTGCCTCTTCCGGATAGATGGATTAGAC
	RP:	AATAGCTTGCTGTCCCACACGAGTAGTATATTCATCTAACGTGGCTCGAA
NRF2	CP:	ACTGAGCCTGATTAGTAGCAATGAAGACTGGGCTCTCGATGTGACCGGGA
	RP:	CATACCGTCTAAATCAACAGGGGCTACCTGAGCAACAGAAGTTTCAGGTG
P4HA1	CP:	CAGAGACTTTATCTATGGTAGAAATCTCGCCTTCATCCAGTTGCCTTAGG
	RP:	CTTATCCAGGTCTCCCTGCTGATATACCGCATAGCTCAAATAATCTAGAA
PDGFRB	CP:	CCGTGAGAAAGATGAATAGTTCCTCGGCATCATTAGGGAGGAAGCCCACG
	RP:	CACCAGCTGTGGGTCTGTTACTCGGCATGGAATGGTGATCTCAGTTATTT
PDK1	CP:	TCAGGTCTCCTTGGAAGTATTGTGCGTAAAGACGTGATATGGGCAATCCA
	RP:	CTTAATGTAGATAACTGCATCTGTCCCGTAACCCTCTAGGGAATACAGCT
PFKFB3	CP:	AGGCCACAACTGTAGGGTCGTCGCACACCGACTCGATGAAAAACGCCTTA
	RP:	GTTGCAGTCTTTGTAATCCGGGCTGGAGATTTTAACTTCCATGATATTGG
PGK1	CP:	ACTTCTTGCTGCTTTCAGGACCACAGTCCAAGCCCAT
	RP:	CATTCCACACAATCTGCTTAGCCCGAGTGACAGCCTCAGCAT
PGM1	CP:	TGAAAAGGAATTGAGATTGATCTAAGCCCGCAGGTCCTCTTTCCCTCACA
	RP:	CTGATGGCTAAGGAGACAAATACCCACGCAGCAGCAATGCAGGAGGGCA
PI3KCA	CP:	ACAGTGGCCTTTTTGCAGAGGACATAATTCGACACTCTTCAAGCCTGAGG
	RP:	GTTCTGAAACAGTAACTCTGACATGATGTCTGGGTTCTCCCAATTCAACC
PKM1	CP:	GGAACTGGACAGAGTACACACAGGAAAGGAAGCTGTCACCCTCTTGCCAT
	RP:	TTGACCCCAAGCCAGGGTTGGGAGTCCTCTGGGCATCCATTTTTTCTAAA
PRDX1	CP:	CTGAGCAATGGTGCGCTTCGGGTCTGATACCAAAGGAATGTTCATGGGTC
	RP:	AAAAGGCCCCTGAACGAGATGCCTTCATCAGCCTTTAAGACCCCATAATC
PTEN	CP:	TGGGTCCTGAATTGGAGGAATATATCTTCACCTTTAGCTGGCAGACCACA
	RP:	AGGTAACGGCTGAGGGAACTCAAAGTACATGAACTTGTCTTCCCGTCGTG
SIRT3	CP:	AACTAGGCACAGAAAGCAGACTCGGTCTGGGATTCCAGTTGGTCT
	RP:	CCCAAGTCTGGATCTTGTAACCAACAGATGCCGAGCTTGCCGTTC
SLC16A4 (MCT4)	CP:	CAGATGGTGTAGGTCATAAGTAGTGGAAATGTGGTGGCTAAAGGAGCAAG
	RP:	CCAGTACAGGCAGTATCAATGCCAGGTAACCACCAGCAAAGATGGCAAAG
SLC1A3	CP:	GTAACTTTTAACATCCTCCTTTGTAATGTTCTGCACTTTCTTCTTGGCCA
	RP:	CCCACAATGACAGCGGTGACTGTGAGCAGCACAAAAGCATTCCGAAACAG
SLC2A6 (GLUT1)	CP:	CCAGATGCCACCAGATCAGAGCGCGATGATATGACTACGTTACTTGGCTG
	RP:	TGCCCATAAGACTTGTGAGGGCAAAGCCGGGTCTTCCTTGCACAG
SNCG	CP:	AGGGGATGGTGTCCAAGGCAGAGGAGCGCTCTTCAG
	RP:	CGCATGTCACTCAAGGCGGGCACTCCTTGTGCTAGG
SOD2 (MnSOD)	CP:	AGTGGAATAAGGCCTGTTGTTCCTTGCAGTGGATCCTGATTTGGACAAGC
	RP:	CATTTTTATACTGAAGGTAGTAAGCGTGCTCCCACACATCAATCCCCAGC
SPARC	CP:	CTCATCCAGGGCGATGTACTTGTCATTGTCCAGGTCACAGGTCTCGAAAA
	RP:	CGATATCCTTCTGCTTGATGCCGAAGCAGCCGGCCCA
TFAM	CP:	CATCGCTCCGGTGGATGAGGCAGTGACCCGACCCCAAT
	RP:	CAGGGCACTCAGCACGCCCCACATGCTTCGGAGAAACGC
TGFB1	CP:	ACGGGTTCAGGTACCGCTTCTCGGAGCTCTGATGTGTTGAAGAACATATA
	RP:	CACTTTTAACTTGAGCCTCAGCAGACGCAGCTCTGCCCGGGAGAGCAAC
TGFB2	CP:	GGACTTGAGAATCTGATATAGCTCAATCCGTTGTTCAGGCACTCTGG
	RP:	TTCACAACTTTGCTGTCGATGTAGCGCTGGGTTGGAGATGTTAAATCTTT
TGFB3	CP:	TGACCTGGAAGGCGTCTAACCAAGTGTCCAAGGGGAAATATGATCGAGGG
	RP:	CCCATAATGCCCCAAGGCTGCATGGAACCACAATCCAGAAATGTGCATCC
TGFBR1	CP:	CAGAAAGGATGGACCAGGGATGTCTATGCCTCACTAAGTCGTATTTCCCC
	RP:	AGGGACCAGCAAGCAGGAGAGCAGGTTCCAAGAAACAGCTGGAGA
TGFBR2	CP:	AGCCATGGAGTAGACATCGGTCTGCTTGAAGGACTCAACATTCTCCAAAT
	RP:	TTTACTTCTCCCACTGCATTACAGCGAGATGTCATTTCCCAGAGCACCAG
TIGAR	CP:	TTTATGTGCTTCCCCTAATATGAGCATGTCCTTGCTGAGTATGACATAGC
	RP:	TAAGCCATGGAATGGGTGTGAGATGCACTGTTCTCTCAGGGATATCTTAC
TIMP1	CP:	TCTCATAACGCTGGTATAAGGTGGTCTGGTTGACTTCTGGTGTC
	RP:	AGCGGCATCCCCTAAGGCTTGGAACCCTTTATACATCTTGGTCATCTTGA
TKTL1	CP:	TCCGGATTCTCTGGATCTGACTGCTTGTACCTCATGATGTAGAAGAACAG
	RP:	TTGCCACATCCACAAACGACAGTCTCTTTGCGAGGACAAATCGGTCGTTG
TNC	CP:	GACACAGAGGCTTGTTGCAGTCATCGCCTGCAAAG
	RP:	TCATTCTCCACGCATCGTCCACGGTTGTAGCAATTGTTGA
TOMM20	CP:	GTTCAAAGATGAAATGTGATTTGTTCAAGGCTGTGCGGCTAATCAGAGGC
	RP:	CCCGAGAAAAGTCCTCAAATGTGAGTCGCCTAGTCTAACAGTAGAGGTAA
mTOR	CP:	AGAGTGGCCTTCAAATTCAAAGCTGCCAAGCGTTCGGAGGGCAAGAGTGA
	RP:	TGCTCACTGTTCAGGAAATGATCCGCACAGTGGCGAACAAATTGGGTCAG
TP53	CP:	TAGACTGACCCTTTTTGGACTTCAGGTGGCTGGAGTGAGCCCTG
	RP:	GTCTGAGTCAGGCCCTTCTGTCTTGAACATGAGTTTTTTATGGCGGGAGG
TPI1	CP:	CTAGGGCCTAGGGAACCCAGGAGCAAATCCCACCACGCCTTCCATCTCTC
	RP:	CTTGGCCTCACGGTGTAAGAAGGGAGAGGATGGTTTCTCTTCTGCCCTCA
TPM2	CP:	CTCCTTCAGCTTCTCCTCCAACAGTTTGATCTCCT
	RP:	CACAGACCTCTCGGCAAACTCTGCTCGGGTCTCAGC
TUBB	CP:	AAAAGGACCTGAGCGAACAGAGTCCATGGTCCCAGGTTCTAGATCCAC
	RP:	CCTGCCCCAGACTGACCAAATACAAAGTTGTCTGGTCTAAAGATCTGGCC
VEGFA	CP:	TGGCCTTGGTGAGGTTTGATCCGCATAATCTGCATGGTGATGTTGGACTC
	RP:	TCTGCATTCACATTTGTTGTGCTGTAGGAAGCTCATCTCTCCTATGTGC
VIM	CP:	CTGAAAGATTGCAGGGTGTTTTCGGCTTCCTCTCTCTGAAGCATCTCCTC
	RP:	CTTTGCGTTCAAGGTCAAGACGTGCCAGAGACGCATTGTCAACATCCTGT
