# Supplementary material for: Molecular characterization of Gleason patterns 3 and 4 prostate cancer using reverse Warburg effect-associated genes
Source: Springer Nature journal article supplement (doi:10.1186/s40170-016-0149-5), 2016-04-14
Supplement: MOESM1 [file 25788184]

|                                                                                                             | Gleason Pattern       |                       | P-value |
|-------------------------------------------------------------------------------------------------------------|-----------------------|-----------------------|---------|
|                                                                                                             | <b>GP4<br/>(N=19)</b> | <b>GP3<br/>(N=15)</b> |         |
| <b>Age (n=34)</b>                                                                                           | 61.4 (6.0)            | 56.3 (7.4)            | 0.03    |
| <b>Pre-op PSA (n=34)</b>                                                                                    | 9.2 (6.4)             | 5.3 (2.4)             | 0.01    |
| <b>% Cancer Tissue (n=34)</b>                                                                               | 50.3 (28.5)           | 31.3 (25.8)           | 0.05    |
| <b>T stage (Pathological) (n=29)</b>                                                                        |                       |                       | 0.01    |
| T1a-T1c                                                                                                     | 1 (6.3%)              | 3 (23.1%)             |         |
| T2a-T2c                                                                                                     | 9 (56.3%)             | 10 (76.9%)            |         |
| T3a-T3b                                                                                                     | 6 (37.4%)             | 0 (0.0%)              |         |
| <b>For categorical variables<br/>used Mantel-Haenszel test<br/>For continuous variables<br/>used T test</b> |                       |                       |         |
